# Supplementary material for: An aptamer-based SERS–LFA biosensor with multiple channels for the ultrasensitive simultaneous detection of serum VEGF and osteopontin in cervical cancer patients
Source: Royal Society of Chemistry journal article supplement (doi:10.1039/d2nj03567g), 2022-01-01
Supplement: d2nj03567g1.pdf [file d2nj03567g1.pdf]

# **An aptamer-based SERS-LFA biosensor with multiple channels for ultrasensitive simultaneous detection of serum VEGF and OPN in cervical cancer patients**

Zhiyue Li<sup>a,b,c</sup>, Yingyan Gu<sup>a,b,d</sup>, Shengjie Ge<sup>a,d,e</sup>, Yu Mao<sup>a,d,e</sup>, Yuexing Gu<sup>a,d,e</sup>, Xiaowei

Cao<sup>a,d,e,\*</sup> and Dan Lu<sup>a,b,c,d,\*</sup>

<sup>a</sup>Institute of Translational Medicine, Medical College, Yangzhou University, Yangzhou, 225001, P. R. China

<sup>b</sup>Department of Obstetrics and Gynecology, College of Clinical Medicine, Yangzhou University, Yangzhou, 225001, P. R. China

<sup>c</sup>The First Clinical College, Dalian Medical University, Dalian, 116011, P. R. China

<sup>d</sup>Jiangsu Key Laboratory of Integrated Traditional Chinese and Western Medicine for Prevention and Treatment of Senile Diseases, Yangzhou University, Yangzhou, 225001, P. R. China

<sup>e</sup>Jiangsu Key Laboratory of Experimental & Translational Noncoding RNA Research, Medical College, Yangzhou University, Yangzhou 225001, P. R. China

\*E-mail: ludan1968@126.com and cxw19861121@163.com

**Table S1. Sequences of the aptamers for VEGF and OPN**

| Name                      | Sequences (from 5' to 3')                                      |
|---------------------------|----------------------------------------------------------------|
| Detection aptamer of VEGF | biotin-<br>TTTTTTTTTGTGGGGGTGGACGGGCCGGGTAGA-<br>SH            |
| Capture aptamer of VEGF   | TTTTTTTTTTTTTTTTTTTTTCAATTGGGCCCGTCC<br>GTATGGTGGGT            |
| Detection aptamer of OPN  | biotin-<br>TGTGTGCGGCACTCCAGTCTGTTACGCCGCTTTT<br>TTTTTATTTT-SH |
| Capture aptamer of OPN    | AAAAAAAAAATGTGTGCGGCACTCCAGTCTGTT<br>ACGCCGC                   |

**Table S2. Information of clinical serum samples.**

| <b>ID</b> | <b>FIGO Stage</b> | <b>Age(y)</b> | <b>Pathology</b> | <b>ID</b> | <b>FIGO Stage</b> | <b>Age(y)</b> | <b>Pathology</b> |
|-----------|-------------------|---------------|------------------|-----------|-------------------|---------------|------------------|
| 1         | IVA               | 48            | Malignant        | 31        | health            | 50            | Control          |
| 2         | IIIC              | 35            | Malignant        | 32        | health            | 44            | Control          |
| 3         | IIIB              | 51            | Malignant        | 33        | health            | 43            | Control          |
| 4         | IIIB              | 44            | Malignant        | 34        | health            | 38            | Control          |
| 5         | IIIA              | 59            | Malignant        | 35        | health            | 51            | Control          |
| 6         | IIIA              | 48            | Malignant        | 36        | health            | 46            | Control          |
| 7         | IIB               | 39            | Malignant        | 37        | health            | 52            | Control          |
| 8         | IIB               | 48            | Malignant        | 38        | health            | 57            | Control          |
| 9         | IIB               | 44            | Malignant        | 39        | health            | 43            | Control          |
| 10        | IIB               | 51            | Malignant        | 40        | health            | 51            | Control          |
| 11        | IIB               | 50            | Malignant        | 41        | health            | 37            | Control          |
| 12        | IIB               | 49            | Malignant        | 42        | health            | 50            | Control          |
| 13        | IIA               | 47            | Malignant        | 43        | health            | 43            | Control          |
| 14        | IIA               | 35            | Malignant        | 44        | health            | 47            | Control          |
| 15        | IIA               | 41            | Malignant        | 45        | health            | 53            | Control          |
| 16        | IIA               | 37            | Malignant        | 46        | health            | 39            | Control          |
| 17        | IIA               | 48            | Malignant        | 47        | health            | 36            | Control          |
| 18        | IIA               | 50            | Malignant        | 48        | health            | 55            | Control          |
| 19        | IIA               | 41            | Malignant        | 49        | health            | 64            | Control          |
| 20        | IIA               | 60            | Malignant        | 50        | health            | 52            | Control          |
| 21        | IB                | 37            | Malignant        | 51        | health            | 60            | Control          |
| 22        | IB                | 46            | Malignant        | 52        | health            | 44            | Control          |
| 23        | IB                | 47            | Malignant        | 53        | health            | 56            | Control          |
| 24        | IB                | 52            | Malignant        | 54        | health            | 36            | Control          |
| 25        | IA                | 36            | Malignant        | 55        | health            | 34            | Control          |
| 26        | IA                | 48            | Malignant        | 56        | health            | 47            | Control          |
| 27        | IA                | 45            | Malignant        | 57        | health            | 39            | Control          |
| 28        | IA                | 53            | Malignant        | 58        | health            | 41            | Control          |
| 29        | IA                | 41            | Malignant        | 59        | health            | 37            | Control          |
| 30        | IA                | 47            | Malignant        | 60        | health            | 45            | Control          |

**Table S3. The levels of VEGF and OPN detected by our method and ELISA in clinical samples.**

| ID | Our method (ng mL <sup>-1</sup> ) |       | ELISA (ng mL <sup>-1</sup> ) |       |
|----|-----------------------------------|-------|------------------------------|-------|
|    | VEGF                              | OPN   | VEGF                         | OPN   |
| 1  | 0.135                             | 0.437 | 0.153                        | 0.451 |
| 2  | 0.136                             | 0.452 | 0.156                        | 0.460 |
| 3  | 0.148                             | 0.472 | 0.165                        | 0.476 |
| 4  | 0.154                             | 0.473 | 0.158                        | 0.472 |
| 5  | 0.169                             | 0.485 | 0.168                        | 0.477 |
| 6  | 0.171                             | 0.501 | 0.187                        | 0.541 |
| 7  | 0.205                             | 0.513 | 0.204                        | 0.495 |
| 8  | 0.228                             | 0.522 | 0.223                        | 0.581 |
| 9  | 0.237                             | 0.552 | 0.235                        | 0.519 |
| 10 | 0.248                             | 0.557 | 0.232                        | 0.588 |
| 11 | 0.319                             | 0.598 | 0.317                        | 0.612 |
| 12 | 0.320                             | 0.612 | 0.332                        | 0.671 |
| 13 | 0.325                             | 0.621 | 0.334                        | 0.583 |
| 14 | 0.354                             | 0.632 | 0.363                        | 0.622 |
| 15 | 0.420                             | 0.653 | 0.408                        | 0.671 |
| 16 | 0.421                             | 0.662 | 0.418                        | 0.629 |
| 17 | 0.422                             | 0.665 | 0.419                        | 0.710 |
| 18 | 0.435                             | 0.681 | 0.419                        | 0.625 |
| 19 | 0.445                             | 0.743 | 0.434                        | 0.733 |
| 20 | 0.449                             | 0.761 | 0.431                        | 0.738 |
| 21 | 0.457                             | 0.772 | 0.439                        | 0.841 |
| 22 | 0.461                             | 0.781 | 0.441                        | 0.850 |
| 23 | 0.509                             | 0.794 | 0.538                        | 0.759 |
| 24 | 0.513                             | 0.802 | 0.551                        | 0.779 |
| 25 | 0.529                             | 0.812 | 0.574                        | 0.841 |
| 26 | 0.552                             | 0.823 | 0.586                        | 0.818 |
| 27 | 0.601                             | 0.912 | 0.589                        | 0.869 |
| 28 | 0.634                             | 0.934 | 0.596                        | 0.959 |
| 29 | 0.653                             | 0.935 | 0.595                        | 0.964 |
| 30 | 0.657                             | 0.943 | 0.634                        | 0.983 |
| 31 | 0.661                             | 0.964 | 0.628                        | 1.011 |
| 32 | 0.663                             | 0.975 | 0.649                        | 1.023 |
| 33 | 0.673                             | 0.987 | 0.659                        | 1.105 |
| 34 | 0.687                             | 0.996 | 0.712                        | 1.051 |
| 35 | 0.731                             | 1.010 | 0.759                        | 0.989 |
| 36 | 0.733                             | 1.111 | 0.761                        | 0.996 |
| 37 | 0.748                             | 1.124 | 0.805                        | 1.132 |
| 38 | 0.759                             | 1.159 | 0.814                        | 1.221 |
| 39 | 0.778                             | 1.235 | 0.811                        | 1.191 |
| 40 | 0.814                             | 1.237 | 0.817                        | 1.188 |
| 41 | 0.819                             | 1.249 | 0.826                        | 1.313 |
| 42 | 0.855                             | 1.251 | 0.847                        | 1.237 |
| 43 | 0.881                             | 1.264 | 0.869                        | 1.286 |
| 44 | 0.923                             | 1.275 | 0.971                        | 1.279 |

---

|    |       |       |       |       |
|----|-------|-------|-------|-------|
| 45 | 0.943 | 1.280 | 0.895 | 1.199 |
| 46 | 0.957 | 1.296 | 0.969 | 1.351 |
| 47 | 0.982 | 1.300 | 0.986 | 1.332 |
| 48 | 0.987 | 1.302 | 1.012 | 1.248 |
| 49 | 1.033 | 1.302 | 1.021 | 1.331 |
| 50 | 1.036 | 1.330 | 1.024 | 1.378 |
| 51 | 1.040 | 1.335 | 1.044 | 1.413 |
| 52 | 1.083 | 1.351 | 1.045 | 1.298 |
| 53 | 1.085 | 1.356 | 1.058 | 1.367 |
| 54 | 1.087 | 1.425 | 1.091 | 1.434 |
| 55 | 1.113 | 1.447 | 1.094 | 1.486 |
| 56 | 1.121 | 1.478 | 1.203 | 1.425 |
| 57 | 1.136 | 1.485 | 1.212 | 1.511 |
| 58 | 1.159 | 1.509 | 1.241 | 1.537 |
| 59 | 1.262 | 1.517 | 1.341 | 1.546 |
| 60 | 1.284 | 1.525 | 1.361 | 1.553 |

---

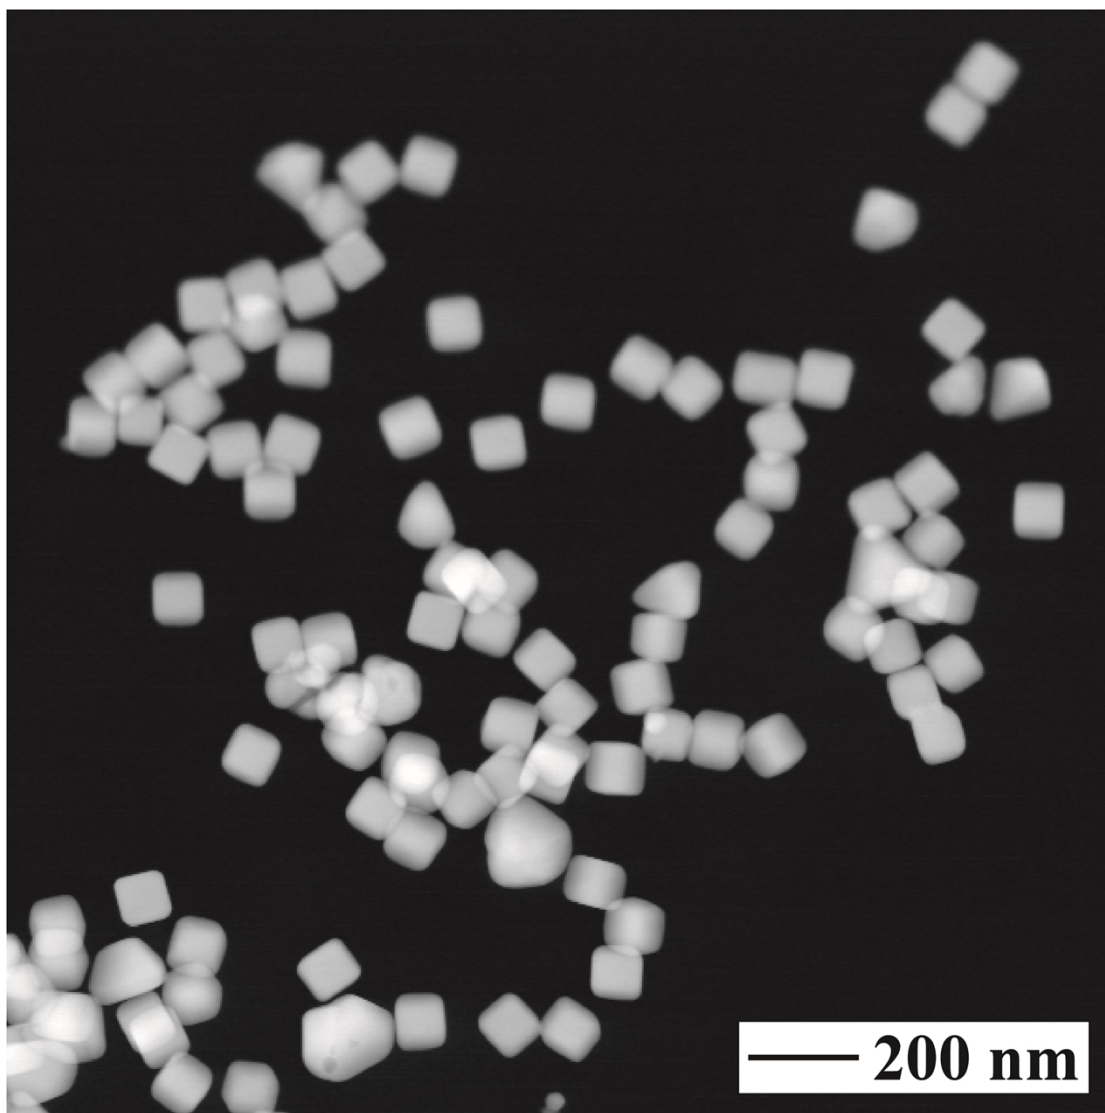

**Fig. S1** TEM image used for size distribution analysis of Cu<sub>2</sub>O NCs
